# Supplementary material for: A GO regulated bimetallic CoFe catalyst for efficient electrochemical nitrate reduction to ammonia under acidic conditions
Source: Royal Society of Chemistry journal article supplement (doi:10.1039/d4cc04897k), 2024-01-01
Supplement: d4cc04897k1.pdf [file d4cc04897k1.pdf]

## Supporting Information

### **GO regulates bimetallic CoFe catalyst for efficient electrochemical nitrate-to-ammonia under acid conditions**

Zhengyang Liu<sup>a#</sup>, Xiaohan Huang<sup>a#</sup>, Linghui Yan<sup>a</sup>, Zehui Zhang<sup>a</sup>, Tao Ding<sup>a</sup>,  
Guosheng Shi<sup>a,b\*</sup>

<sup>a</sup>Shanghai Applied Radiation Institute, State Key Lab. Advanced Special Steel,  
Shanghai University, Shanghai 200444, China;

\*E-mail: gsshi@shu.edu.cn

<sup>b</sup>Wenzhou Institute, University of Chinese Academy of Sciences, Wenzhou 325001,  
China

<sup>#</sup>These authors contributed equally to this work.

## Contents

|                                                                                                                                                                                                                                               |     |
|-----------------------------------------------------------------------------------------------------------------------------------------------------------------------------------------------------------------------------------------------|-----|
| <b>1. Materials and Methods</b>                                                                                                                                                                                                               | S3  |
| <b>1.1 Chemicals</b>                                                                                                                                                                                                                          | S3  |
| <b>1.2 Preparation of GO</b>                                                                                                                                                                                                                  | S3  |
| <b>1.3 Synthesis of the CoFe<sub>2</sub>O<sub>4</sub>/GO catalysts</b>                                                                                                                                                                        | S3  |
| <b>1.4 Synthesis of the Fe/GO catalysts</b>                                                                                                                                                                                                   | S4  |
| <b>1.5 Synthesis of the Co/GO catalysts</b>                                                                                                                                                                                                   | S4  |
| <b>1.6 Microstructural and chemical characterization</b>                                                                                                                                                                                      | S5  |
| <b>1.7 Electrocatalytic measurements of nitrate reduction</b>                                                                                                                                                                                 | S5  |
| <b>1.8 UV-Vis spectrophotometry</b>                                                                                                                                                                                                           | S6  |
| <b>1.9 Calculation of other conditional parameters</b>                                                                                                                                                                                        | S6  |
| <b>1.10 ECSA evaluation</b>                                                                                                                                                                                                                   | S7  |
| <b>Figure S1.</b> SEM images of (a) Fe/GO and (b) Co/GO.                                                                                                                                                                                      | S8  |
| <b>Figure S2.</b> XRD pattern of Fe/GO and Co/GO.                                                                                                                                                                                             | S8  |
| <b>Figure S3.</b> (a) XPS spectrum (inset shows corresponding elements content) and spectra of (b) C 1s and (c) O 1s of CoFe <sub>2</sub> O <sub>4</sub> /GO.                                                                                 | S8  |
| <b>Figure S4.</b> LSV curves of CoFe <sub>2</sub> O <sub>4</sub> /GO catalyst in 0.05 M H <sub>2</sub> SO <sub>4</sub> solution with and without NO <sub>3</sub> <sup>-</sup> -N.                                                             | S9  |
| <b>Figure S5.</b> The R(CR)W equivalent circuit model.                                                                                                                                                                                        | S9  |
| <b>Figure S6.</b> CV curves of (a) CoFe <sub>2</sub> O <sub>4</sub> /GO, (b) Fe/GO and (c) Co/GO in 0.05 M H <sub>2</sub> SO <sub>4</sub> solution at different sweep rates.                                                                  | S9  |
| <b>Figure S7.</b> (a) UV-Vis absorption spectra and (b) concentration-absorbance calibration curve of NO <sub>3</sub> <sup>-</sup> -N. (c) Photo of nitrate reactant reagent with increasing NO <sub>3</sub> <sup>-</sup> -N concentration.   | S9  |
| <b>Figure S8.</b> (a) UV-Vis absorption spectra and (b) concentration-absorbance calibration curve of NO <sub>2</sub> <sup>-</sup> -N. (c) Photo of nitrite colorant reagent with increasing NO <sub>2</sub> <sup>-</sup> -N concentration.   | S10 |
| <b>Figure S9.</b> (a) UV-Vis absorption spectra and (b) concentration-absorbance calibration curve of NH <sub>4</sub> <sup>+</sup> -N. (c) Photo of modified Nessler's reagent with increasing NH <sub>4</sub> <sup>+</sup> -N concentration. | S10 |
| <b>Figure S10.</b> CA curves of CoFe <sub>2</sub> O <sub>4</sub> /GO catalyst during six consecutive recycling ENRA at -1.3 V vs. RHE in 0.05 M H <sub>2</sub> SO <sub>4</sub> solution with 3000 ppm NO <sub>3</sub> <sup>-</sup> -N.        | S10 |
| <b>Figure S11.</b> (a) SEM image, (b) XRD pattern and (c, d) TEM images of CoFe <sub>2</sub> O <sub>4</sub> /GO catalyst after cyclic test.                                                                                                   | S11 |
| <b>Table S1.</b> Comparison of ENRA properties of CoFe <sub>2</sub> O <sub>4</sub> /GO and reported catalysts under acidic conditions.                                                                                                        | S12 |
| <b>References</b>                                                                                                                                                                                                                             | S13 |

## 1. Materials and Methods

### 1.1 Chemicals

Potassium nitrate ( $\text{KNO}_3$ , 99.9%), hydrochloric acid ( $\text{HCl}$ , 36.0%) and methanol ( $\text{CH}_3\text{OH}$ , 99.9%) were procured from Beijing Chemical Works, while ammonium chloride ( $\text{NH}_4\text{Cl}$ , 99.5%), sodium nitrite ( $\text{NaNO}_2$ , 99%) and phosphoric acid ( $\text{H}_3\text{PO}_4$ ) were obtained from Sinopharm Chemical Reagent Co., Ltd. Sulfamic acid ( $\text{NH}_2\text{SO}_3\text{H}$ ), N-(1-Naphthyl) ethylenediamine dihydrochloride ( $\text{C}_{12}\text{H}_{16}\text{Cl}_2\text{N}_2$ ), p-aminobenzenesulfonamide ( $\text{C}_6\text{H}_8\text{N}_2\text{O}_2\text{S}$ ), anhydrous ethanol ( $\text{C}_2\text{H}_5\text{OH}$ ,  $\geq 99.5\%$ ), cobaltous nitrate hexahydrate ( $\text{Co}(\text{NO}_3)_2 \cdot 6\text{H}_2\text{O}$ ), ferric nitrate nonahydrate ( $\text{Fe}(\text{NO}_3)_3 \cdot 9\text{H}_2\text{O}$ ) and potassium sodium tartrate solution ( $\text{C}_4\text{H}_4\text{KNaO}_6$ ) were all purchased from Adamas-beta Chemical Co., Ltd. Dimethylimidazole ( $\text{C}_4\text{H}_6\text{N}_2$ ) was procured from Aladdin Biochemical Technology Co., Ltd. Nessler's reagent ( $\text{HgI}_4\text{K}_2$ ) were acquired from Macklin Inc (China). Nafion solution (5%) was procured from DuPont Company. Carbon cloth was purchased from Carbon Energy Technology Co., Ltd (China). All chemical reagents were used as received without the need for further purification. Deionized (DI) water with a resistivity of  $18.2 \text{ M}\Omega \cdot \text{cm}$  was obtained through reverse osmosis, ion exchange and filtration.

### 1.2 Preparation of GO

GO was prepared from natural graphite powder by a modified Hummer process<sup>1,2</sup>. The  $5 \text{ mg mL}^{-1}$  GO solution was prepared then stored at room temperature.

### 1.3 Synthesis of the $\text{CoFe}_2\text{O}_4/\text{GO}$ catalysts

The  $\text{CoFe}_2\text{O}_4/\text{GO}$  catalysts were successively obtained by solution self-assembly and high temperature annealing methods.  $7.5 \text{ mL } 5 \text{ mg/mL}$  GO solution was first mixed with  $67.5 \text{ mL}$  methanol for 10 min ultrasonic treatment. Then  $0.05 \text{ mol L}^{-1}$  (M)  $\text{Fe}(\text{NO}_3)_3 \cdot 9\text{H}_2\text{O}$  and  $0.10 \text{ M } \text{Co}(\text{NO}_3)_2 \cdot 6\text{H}_2\text{O}$  were added successively, and ultrasonic treatment was carried out for 10 min each time until completely dissolved which recorded the above mixed solution as solution A. Meanwhile,  $0.40 \text{ M}$  dimethylimidazole was mixed with  $75 \text{ mL}$  methanol for 10 min by sonication until dissolved, and the above mixed solution was recorded as solution B. After that, solution B was slowly and evenly poured into solution A, then the mixed solution was self-assembled with 600 rpm magnetic stirring for 6 h at room temperature. The mixture was then centrifuged three times at 10000 rpm for 3 min each time. The bare  $\text{CoFe}_2\text{O}_4/\text{GO}$  powder samples were obtained by cleaning with anhydrous ethanol and drying overnight under vacuum.

The treated bare  $\text{CoFe}_2\text{O}_4/\text{GO}$  powder samples were placed in a crucible and calcined in a tube furnace at  $600^\circ\text{C}$  for 2 h in an argon (Ar) atmosphere at a heating rate of  $10^\circ\text{C}/\text{min}$ . After annealing to room temperature, the products were vacuum dried overnight to obtain the  $\text{CoFe}_2\text{O}_4/\text{GO}$  powder samples. After mixing 5 mg powder with  $80 \mu\text{L}$  DI,  $920 \mu\text{L}$  ethanol and  $20 \mu\text{L}$  5% Nafion solution, ultrasonic treatment was

carried out for 10 min to obtain ink. Finally, 150  $\mu\text{L}$  ink was evenly drop coating to both sides of the carbon cloth and dried with the aid of infrared lamp to prepare the  $\text{CoFe}_2\text{O}_4/\text{GO}$  catalysts for electrode treatment.

#### **1.4 Synthesis of the Fe/GO catalysts**

The Fe/GO catalysts were successively obtained by solution self-assembly and high temperature annealing methods. 7.5 mL 5 mg/mL GO solution was first mixed with 67.5 mL methanol for 10 min ultrasonic treatment. Then 0.05 M  $\text{Fe}(\text{NO}_3)_3 \cdot 9\text{H}_2\text{O}$  was added and ultrasonic treatment was carried out for 10 min until completely dissolved which recorded the above mixed solution as solution A. Meanwhile, 0.40 M dimethylimidazole was mixed with 75 mL methanol for 10 min by sonication until dissolved, and the above mixed solution was recorded as solution B. After that, solution B was slowly and evenly poured into solution A, then the mixed solution was self-assembled with 600 rpm magnetic stirring for 6 h at room temperature. The mixture was then centrifuged three times at 10000 rpm for 3 min each time. The bare Fe/GO powder samples were obtained by cleaning with anhydrous ethanol and drying overnight under vacuum.

The treated bare Fe/GO powder samples were placed in a crucible and calcined in a tube furnace at 600°C for 2 h in an argon (Ar) atmosphere at a heating rate of 10°C/min. After annealing to room temperature, the products were vacuum dried overnight to obtain the Fe/GO powder samples. After mixing 5 mg powder with 80  $\mu\text{L}$  DI, 920  $\mu\text{L}$  ethanol and 20  $\mu\text{L}$  5% Nafion solution, ultrasonic treatment was carried out for 10 min to obtain ink. Finally, 150  $\mu\text{L}$  ink was evenly drop coating to both sides of the carbon cloth and dried with the aid of infrared lamp to prepare the Fe/GO catalysts for electrode treatment.

#### **1.5 Synthesis of the Co/GO catalysts**

The Co/GO catalysts were successively obtained by solution self-assembly and high temperature annealing methods. 7.5 mL 5 mg/mL GO solution was first mixed with 67.5 mL methanol for 10 min ultrasonic treatment. Then 0.10 M  $\text{Co}(\text{NO}_3)_2 \cdot 6\text{H}_2\text{O}$  were added and ultrasonic treatment was carried out for 10 min until completely dissolved which recorded the above mixed solution as solution A. Meanwhile, 0.40 M dimethylimidazole was mixed with 75 mL methanol for 10 min by sonication until dissolved, and the above mixed solution was recorded as solution B. After that, solution B was slowly and evenly poured into solution A, then the mixed solution was self-assembled with 600 rpm magnetic stirring for 6 h at room temperature. The mixture was then centrifuged three times at 10000 rpm for 3 min each time. The bare Co/GO powder samples were obtained by cleaning with anhydrous ethanol and drying overnight under vacuum.

The treated bare Co/GO powder samples were placed in a crucible and calcined in a tube furnace at 600°C for 2 h in an argon (Ar) atmosphere at a heating rate of 10°C/min.

After annealing to room temperature, the products were vacuum dried overnight to obtain the Co/GO powder samples. After mixing 5 mg powder with 80  $\mu\text{L}$  DI, 920  $\mu\text{L}$  ethanol and 20  $\mu\text{L}$  5% Nafion solution, ultrasonic treatment was carried out for 10 min to obtain ink. Finally, 150  $\mu\text{L}$  ink was evenly drop coating to both sides of the carbon cloth and dried with the aid of infrared lamp to prepare the Co/GO catalysts for electrode treatment.

### 1.6 Microstructural and chemical characterization

The morphology of the samples was studied via transmission electron microscopy (TEM; Tecnai G2 F20 S-Twin) at an acceleration voltage of 200 kV and scanning electron microscope (SEM, ZEISS Gemini 300). The crystal structures of the samples were characterized via X-ray diffraction (XRD, Rigaku, Smartlab). X-ray photoelectron spectroscopy (XPS) measurements were carried out on a Thermofisher Scientific K-Alpha spectrometer, using Al  $K\alpha$  X-ray radiation (1486.6 eV) for excitation. X-ray spectrometers (EDS) were detected by Oxford Ultim Max 100. In situ attenuated total reflection fourier transform infrared spectroscopy (ATR-FTIR) was measured by Bruker TENSOR II with a resolution of 0.4  $\text{cm}^{-1}$  and a beam range from 350 to 8000  $\text{cm}^{-1}$ . The ion concentration in solution was measured by UV-Vis absorption spectroscopy (UV-1600, Mapada, China).

### 1.7 Electrocatalytic measurements of nitrate reduction

The electrochemical measurements were performed using a CHI760E electrochemical workstation (Chenhua, Shanghai) in a cation-exchange membrane separated H-type electrolytic cell. A three-electrode cell system was prepared by using  $\text{CoFe}_2\text{O}_4/\text{GO}$  (1  $\text{cm}^2$ ) working electrode and other catalysts. Platinum foil (1  $\times$  1  $\text{cm}^2$ ) and saturated calomel electrode (SCE) were used as counter and reference electrodes. The dissolved  $\text{O}_2$  and  $\text{N}_2$  in 0.05 M  $\text{H}_2\text{SO}_4$  solution electrolyte were purified by argon (Ar, 99.99%) for about 30 min. Cyclic voltammetry (CV) was used for 20 cycles until the working electrode was activated, and a stable CV curve was obtained. Linear sweep voltammetry (LSV) was measured at a sweep rate of 10  $\text{mV s}^{-1}$  to remove bubbles, and without stirring during special experiments. The change of materials current response with time under specific voltage was used by chronoamperometry (CA) method. Two flow pumps were employed to circulate a 0.05 M  $\text{H}_2\text{SO}_4$  solution containing  $\text{KNO}_3$  through the cathode and 0.05 M  $\text{H}_2\text{SO}_4$  solution through the anode chambers respectively, with a flow rate of 20  $\text{mL min}^{-1}$ . Ar gas flow was maintained at all times during electrochemical measurements. All polarization curves were not internal resistance ( $iR$ ) corrected.

For all the electrochemical measurements, the applied potentials have been converted to the reversible hydrogen electrode (RHE) scale by means of the following equation:

$$E_{\text{RHE}} = E_{\text{SCE}} + 0.059 \times \text{pH} + 0.241$$

### 1.8 UV-Vis spectrophotometry

The concentrations of  $\text{NO}_3^-$ -N, nitrite ( $\text{NO}_2^-$ ) -N and ammonium ( $\text{NH}_4^+$ ) -N were estimated by UV-Vis spectrophotometry.

#### Determination of $\text{NO}_3^-$ -N

To prepare the solution for analysis, a certain volume of electrolyte was taken and diluted to a final volume of 5 mL within the detection range. Then, 100  $\mu\text{L}$  of 1 M HCl and 10  $\mu\text{L}$  of 0.8 wt% sulfamic acid solution were added to the solution. The absorption spectrum was analyzed by a UV-Vis spectrophotometer, and the absorption intensities at 200 and 275 nm wavelengths were measured. Using the formula to determine the absorbance value:

$$A = A_{220\text{nm}} - 2A_{275\text{nm}}$$

Standard potassium nitrate solutions were utilized to create a concentration-absorption curve.

#### Determination of $\text{NO}_2^-$ -N

The nitrite color reagent was prepared as follows: 0.2 g N-(1-Naphthyl) ethylenediamine dihydrochloride, 4 g p-aminobenzenesulfonamide, 10 mL phosphoric acid ( $\rho = 1.70 \text{ g mL}^{-1}$ ), and 50 mL DI water were made to a mixture solution. A certain amount of electrolyte was extracted from the electrolytic cell and diluted to 5 mL, which was within the detection range. Subsequently, 100  $\mu\text{L}$  of the color reagent was added to the 5 mL solution and mixed thoroughly before being left to sit for 20 min. The absorption spectrum was measured by an UV-Vis spectrophotometer, and the absorption intensity at 540 nm was recorded. A calibration curve was generated via a range of standard solutions of sodium nitrite to establish the relationship between the concentration and absorbance.

#### Determination of $\text{NH}_4^+$ -N

To prepare the samples for analysis, a certain volume of electrolyte was extracted from the electrolytic cell and diluted to 5 mL to fall within the detection range. Afterwards, 100  $\mu\text{L}$  of potassium sodium tartrate solution ( $\rho = 500 \text{ g L}^{-1}$ ) was added to the solution and mixed thoroughly. Then, 100  $\mu\text{L}$  of modified Nessler's reagent was added to the mixture and thoroughly mixed again before leaving it in the dark for 20 min. Finally, the absorption spectrum was measured using an UV-Vis spectrophotometer to record the absorption intensities at 420 nm. Concentration-absorption curves was established using a series of standard ammonium chloride solutions.

### 1.9 Calculation of other conditional parameters

The faradaic efficiency (FE) for the  $\text{NH}_3$  production was defined as charge conversion to  $\text{NH}_3$  divided by the total charge passed through the electrodes during the electrolysis (Q), and Q was calculated based on the integration of the curve I (A) vs t (s). Since it was assumed that 8 electrons were required to form an  $\text{NH}_3$  molecule, the formula was as follows:

$$FE = (8 \times F \times c \times V) / Q$$

where  $c$  represents the measured  $\text{NH}_3$  concentration,  $\text{mmol L}^{-1}$ ;  $V$  is the volume of  $\text{H}_2\text{SO}_4$  electrolyte (60 mL), and  $F$  is the Faraday constant ( $96485 \text{ C mol}^{-1}$ ).

The yield rate (YR) of  $\text{NH}_3$  was expressed as equation:

$$YR = (c \times V) / (t \times A)$$

where  $t$  is the duration of the electrochemical test, h; and  $A$  is the area of the geometrical cathode,  $\text{cm}^2$ .

The conversion rate of  $\text{NO}_3^-$  can be expressed in the following formula:

$$\text{Conversion} = \Delta C_{\text{NO}_3^-} / C_0 \times 100\%$$

The equations used to obtain the selectivity of  $\text{NH}_3$  and  $\text{NO}_2^-$  are as follows:

$$\text{Selectivity} = C / \Delta C_{\text{NO}_3^-} \times 100\%$$

where  $C_0$  is the initial concentration of  $\text{NO}_3^-$ ,  $\Delta C_{\text{NO}_3^-}$  is the concentration difference of  $\text{NO}_3^-$  before and after the electrocatalysis, and  $C$  is the concentration of each product after the electrochemical test, including  $\text{NO}_2^-$  and  $\text{NH}_3$ .

### 1.10 ECSA evaluation

The ECSA value was in direct proportion to the ratio of double-layer capacitance ( $C_{dl}$ ) of the working electrode. All catalysts were scanned in 0.05 M  $\text{H}_2\text{SO}_4$  at the sweep rates of 10, 20, 30, 40, 50 and 60  $\text{mV s}^{-1}$ . The potential range was  $-0.50$  to  $-0.60 \text{ V}$  vs. RHE for the  $\text{CoFe}_2\text{O}_4/\text{GO}$ ,  $\text{Fe}/\text{GO}$  and  $\text{Co}/\text{GO}$ . Then, the differential current density for different scanning rate differences was calculated, and a graphical representation corresponding to their respective scanning rates was constructed for each catalyst. Through linear regression analysis, the relationship between current density and scanning rate was derived, and the slope was extracted to determine the double layer capacitance of different catalysts.

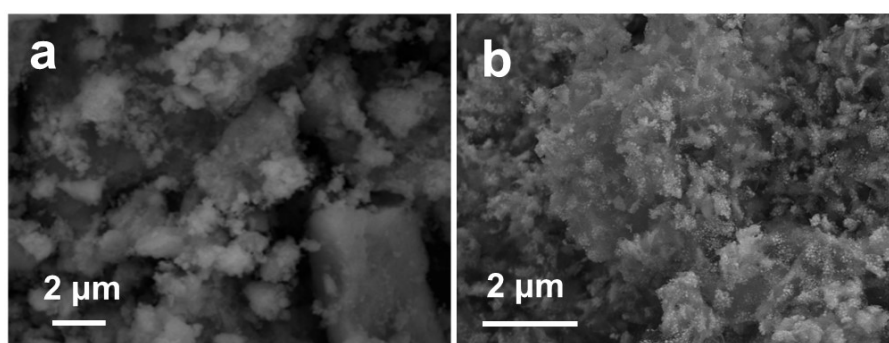

**Figure S1.** SEM images of (a) Fe/GO and (b) Co/GO.

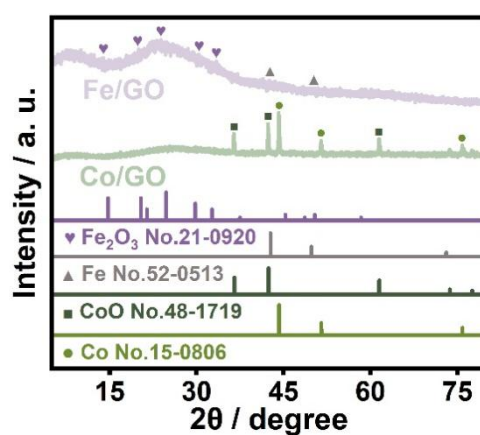

**Figure S2.** XRD pattern of Fe/GO and Co/GO.

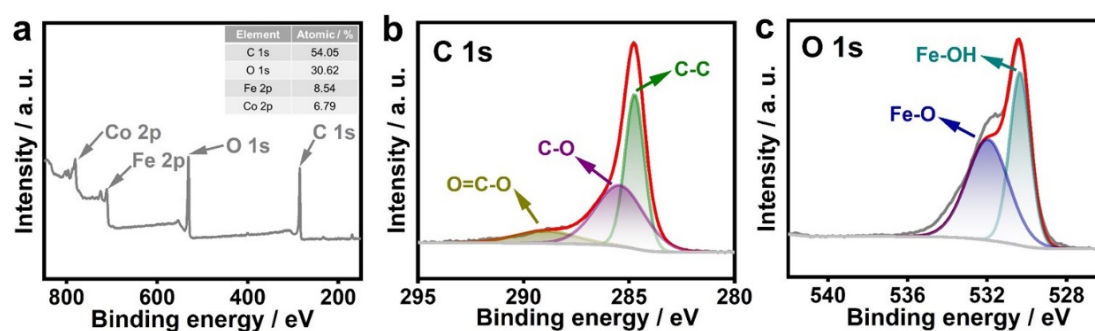

**Figure S3.** (a) XPS spectrum (inset shows corresponding elements content) and spectra of (b) C 1s and (c) O 1s of  $\text{CoFe}_2\text{O}_4/\text{GO}$ .



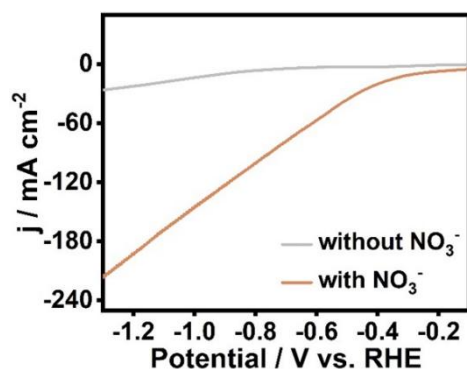

**Figure S4.** LSV curves of  $\text{CoFe}_2\text{O}_4/\text{GO}$  catalyst in 0.05 M  $\text{H}_2\text{SO}_4$  solution with and without  $\text{NO}_3^-$ -N.

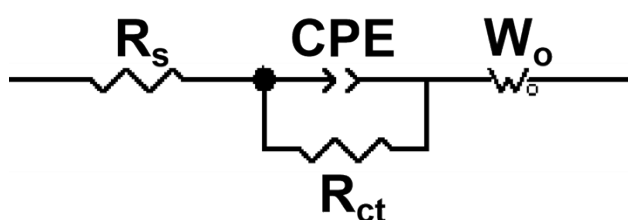

**Figure S5.** The R(CR)W equivalent circuit model.

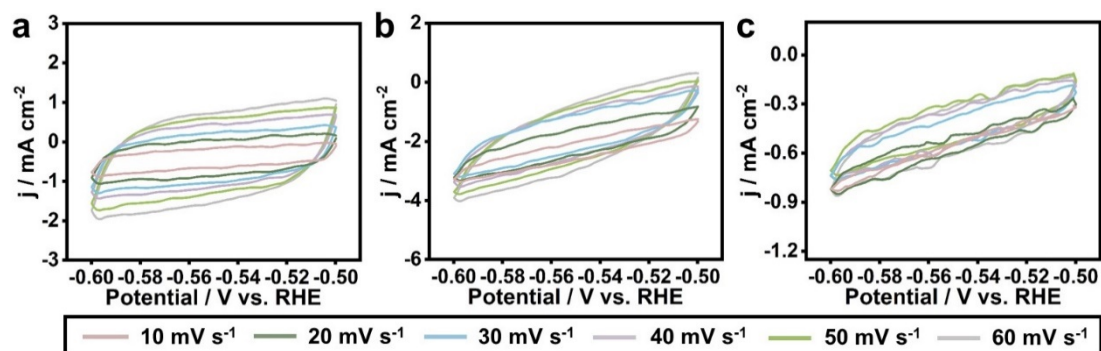

**Figure S6.** CV curves of (a)  $\text{CoFe}_2\text{O}_4/\text{GO}$ , (b)  $\text{Fe}/\text{GO}$  and (c)  $\text{Co}/\text{GO}$  in 0.05 M  $\text{H}_2\text{SO}_4$  solution at different sweep rates.

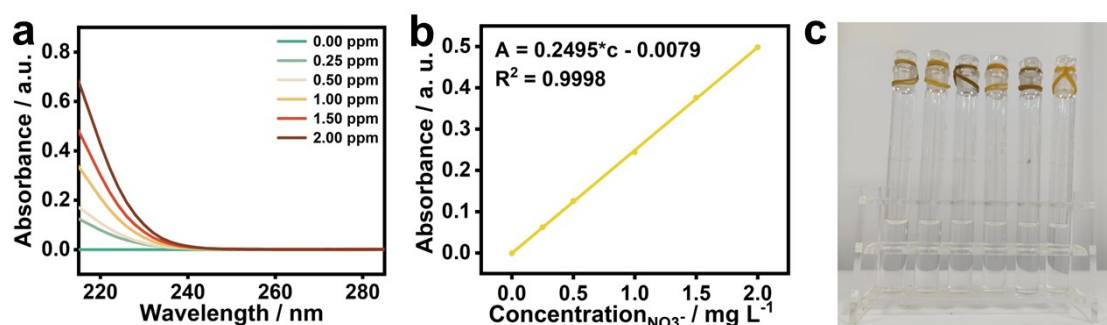

**Figure S7.** (a) UV-Vis absorption spectra and (b) concentration-absorbance calibration curve of  $\text{NO}_3^-$ -N. (c) Photo of nitrate reactant reagent with increasing  $\text{NO}_3^-$ -N concentration.

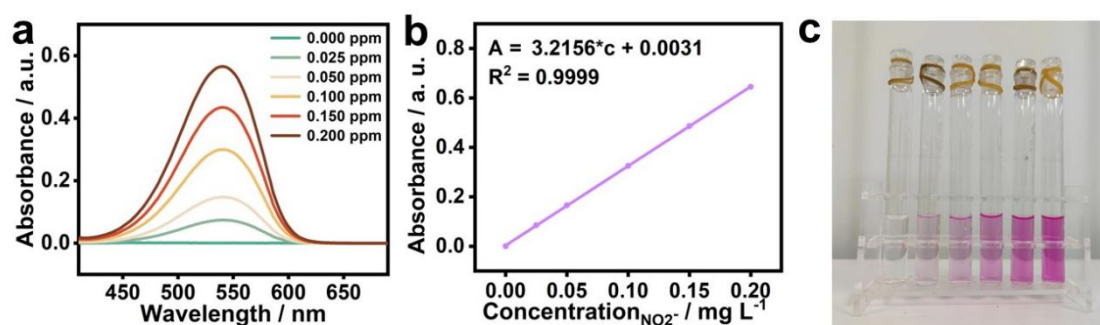

**Figure S8.** (a) UV-Vis absorption spectra and (b) concentration-absorbance calibration curve of  $\text{NO}_2^-$ -N. (c) Photo of nitrite colorant reagent with increasing  $\text{NO}_2^-$ -N concentration.

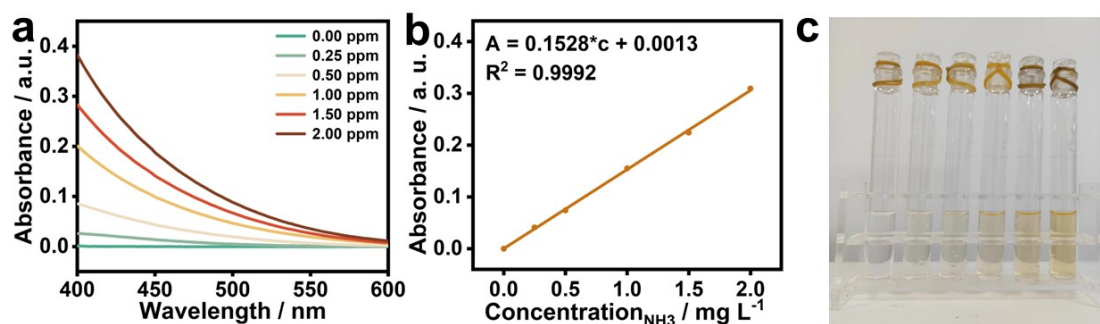

**Figure S9.** (a) UV-Vis absorption spectra and (b) concentration-absorbance calibration curve of  $\text{NH}_4^+$ -N. (c) Photo of modified Nessler's reagent with increasing  $\text{NH}_4^+$ -N concentration.

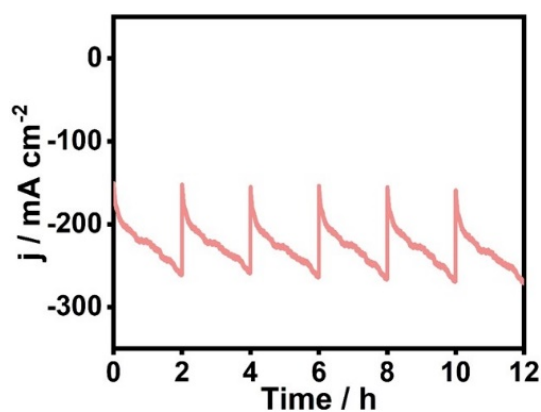

**Figure S10.** CA curves of  $\text{CoFe}_2\text{O}_4/\text{GO}$  catalyst during six consecutive recycling ENRA at  $-1.3$  V vs. RHE in  $0.05$  M  $\text{H}_2\text{SO}_4$  solution with  $3000$  ppm  $\text{NO}_3^-$ -N.

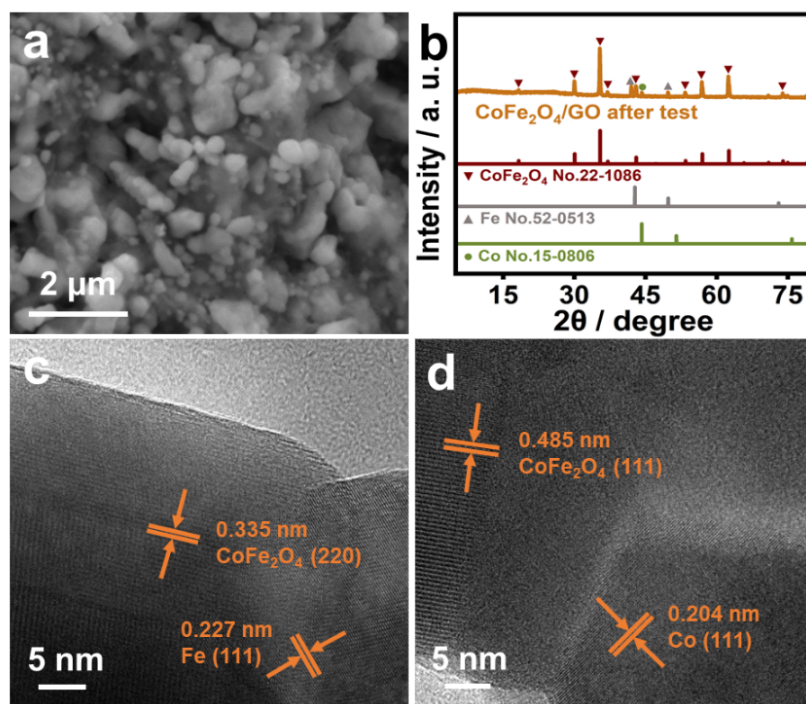

**Figure S11.** (a) SEM image, (b) XRD pattern and (c, d) TEM images of CoFe<sub>2</sub>O<sub>4</sub>/GO catalyst after cyclic test.

**Table S1.** Comparison of ENRA properties of CoFe<sub>2</sub>O<sub>4</sub>/GO and reported catalysts under acidic conditions.

| Catalysts                            | Electrolyte                                                                                                                   | FE (%) | NH <sub>3</sub> yield rate<br>( $\mu\text{mol h}^{-1} \text{cm}^{-2}$ ) | Ref.             |
|--------------------------------------|-------------------------------------------------------------------------------------------------------------------------------|--------|-------------------------------------------------------------------------|------------------|
| CoFe <sub>2</sub> O <sub>4</sub> /GO | 0.05 M H <sub>2</sub> SO <sub>4</sub> +<br>0.5 M K <sub>2</sub> SO <sub>4</sub>                                               | 95.51  | 1268.04                                                                 | <b>This work</b> |
| Fe <sub>2</sub> Co-MOF               | 0.214 M NO <sub>3</sub> <sup>-</sup> -N<br>0.05 M H <sub>2</sub> SO <sub>4</sub> +<br>0.069 M NO <sub>3</sub> <sup>-</sup> -N | 90.55  | 303.73                                                                  | 3                |
| Ti                                   | 0.1 M HNO <sub>3</sub> +<br>0.3 M NO <sub>3</sub> <sup>-</sup> -N                                                             | 82     | 108.82                                                                  | 4                |
| Ir NTs                               | 0.1 M HClO <sub>4</sub> +<br>1 M NO <sub>3</sub> <sup>-</sup> -N                                                              | 84.7   | 216.71                                                                  | 5                |
| FC                                   | 0.05 M H <sub>2</sub> SO <sub>4</sub> +<br>0.014 M NO <sub>3</sub> <sup>-</sup> -N                                            | 20     | 700                                                                     | 6                |
| F-doped carbon                       | 0.05 M H <sub>2</sub> SO <sub>4</sub>                                                                                         | 54.8   | 58.15                                                                   | 7                |
| Ru Sas/GDY/G                         | 0.05 M H <sub>2</sub> SO <sub>4</sub> +<br>0.5 M Na <sub>2</sub> SO <sub>4</sub>                                              | 37.6   | 28.4                                                                    | 8                |
| O-MoC@NC                             | 0.1 mM HCl +<br>0.5 M Li <sub>2</sub> SO <sub>4</sub>                                                                         | 25.1   | 90                                                                      | 9                |
| Fe-SnO <sub>2</sub> /CP              | 0.1 M HCl                                                                                                                     | 20.4   | 41.35                                                                   | 10               |
| PC/Sb/SbPO <sub>4</sub>              | 0.1 M HCl                                                                                                                     | 31     | 125                                                                     | 11               |

Note: NO<sub>3</sub><sup>-</sup>-N not shown in the electrolyte part that not mentioned in the corresponding literatures.

## References

- 1 L. Chen, G. Shi, J. Shen, B. Peng, B. Zhang, Y. Wang, F. Bian, J. Wang, D. Li, Z. Qian, G. Xu, G. Liu, J. Zeng, L. Zhang, Y. Yang, G. Zhou, M. Wu, W. Jin, J. Li and H. Fang, *Nature* 2017, **550**, 415-418.
- 2 G. Shi, L. Chen, Y. Yang, D. Li, Z. Qian, S. Liang, L. Yan, L. Li, M. Wu and H. Fang, *Nat. Chem.* 2018, **10**, 776–779.
- 3 Y. Lv, S. W. Ke, Y. Gu, B. Tian, L. Tang, P. Ran, Y. Zhao, J. Ma, J. L. Zuo and M. Ding, *Angew. Chem. Int. Ed.* 2023, **62**, e202305246.
- 4 J. M. McEnaney, S. J. Blair, J. A. Nielander, D. M. Koshy, M. Cargnello and T. F. Jaramillo, *Angew. ACS Sustainable Chem. Eng.* 2020, **8**, 2672–2681.
- 5 J. Y. Zhu, Q. Xue, Y. Y. Xue, Y. Ding, F. M. Li, P. Jin, P. Chen and Y. Chen, *ACS Appl. Mater. Inter.* 2020, **12**, 14064–14070.
- 6 Y. Li, S. Xiao, X. Li, C. Chang, M. Xie, J. Xu and Z. Yang, *Mater. Today Phys.* 2021, **19**, 100431.
- 7 Y. Liu, Q. Li, X. Guo, X. Kong, J. Ke, M. Chi, Q. Li and Z. Geng, *Adv. Mater.* 2020, **32**, 1907690.
- 8 X. Feng, J. Liu, L. Chen, Y. Kong, Z. Zhang, Z. Zhang, D. Wang, W. Liu, S. Li, L. Tong and J. Zhang, *J. Am. Chem. Soc.* 2023, **145**, 10259–10267
- 9 X. Qu, L. Shen, Y. Mao, J. Lin, Y. Li, G. Li, Y. Zhang, Y. Jiang and S. Sun, *ACS Appl. Mater. Interfaces* 2019, **11**, 31869–31877.
- 10 L. Zhang, M. Cong, X. Ding, Y. Jin, F. Xu, Y. Wang, L. Chen and L. Zhang, *Angew. Chem. Int. Ed.* 2020, **59**, 10888-10893.
- 11 X. Liu, H. Jang, P. Li, J. Wang, Q. Qin, M.G. Kim, G. Li and J. Cho, *Angew. Chem. Int. Ed.* 2019, **58**, 13329–13334.
